# Supplementary material
Source: PubMed Central journal article supplement (PMC122405)
Supplement: pnas_99_5_2666__5.pdf [file pnas_99_5_2666__5.pdf]

Supporting information for Dasgupta *et al.* (2002) *Proc. Natl. Acad. Sci. USA* **99** (5), 2666–2671. (10.1073/pnas.052397899)

**Table 1. Quantitation of Northern (Fig. 1)**

| Gene name                                  | Ratio of <i>mot1-14</i> to <i>MOT1+</i> | Ratio of <i>mot1-42</i> to <i>MOT1+</i> | Ratio of <i>taf145-869</i> to <i>TAF145+</i> | Ratio of <i>tsm1 ts</i> to <i>TSM1+</i> | Ratio of <i>toa2-3</i> to <i>TOA2+</i> |
|--------------------------------------------|-----------------------------------------|-----------------------------------------|----------------------------------------------|-----------------------------------------|----------------------------------------|
| <i>MOT1</i> -regulated genes               |                                         |                                         |                                              |                                         |                                        |
| <i>INO1</i>                                | 5.9                                     | 4.9                                     | 0.75                                         | 1.2                                     | 0.97                                   |
| <i>THI5</i>                                | 4.6                                     | 4.5                                     | 0.78                                         | 1.2                                     | 0.38                                   |
| <i>YDR533C</i>                             | 4.5                                     | 4.2                                     | 1.6                                          | 2.5                                     | 0.70                                   |
| <i>YGR043C</i>                             | 5.2                                     | 5.3                                     | 3.2                                          | 1.9                                     | 1.1                                    |
| <i>AGA1</i>                                | 4.5                                     | 3.0                                     | 0.35                                         | 1.1                                     | 0.36                                   |
| <i>HSP26</i>                               | 3.8                                     | 4.5                                     | 4.2                                          | 1.7                                     | 2.3                                    |
| <i>TSL1</i>                                | 3.2                                     | 1.8                                     | 2.1                                          | 1.4                                     | 1.4                                    |
| <i>BNA1</i>                                | 0.26                                    | 0.49                                    | 0.15                                         | 0.46                                    | 0.19                                   |
| <i>URA1</i>                                | 0.28                                    | 0.50                                    | 0.45                                         | 1.2                                     | 0.54                                   |
| <i>YDR539W</i>                             | 0.26                                    | 0.38                                    | 0.32                                         | 0.51                                    | 0.20                                   |
| Genes not affected by <i>MOT1</i> mutation |                                         |                                         |                                              |                                         |                                        |
| <i>RPL5</i>                                | 1.0                                     | 1.2                                     | 0.44                                         | 1.6                                     | 0.80                                   |
| <i>RPS5</i>                                | 1.1                                     | 1.2                                     | 0.38                                         | 1.5                                     | 0.76                                   |
| <i>ACT1</i>                                | 1.3                                     | 1.6                                     | 0.78                                         | 2.0                                     | 1.1                                    |
| <i>SAN1</i>                                | 0.7                                     | 0.9                                     | 0.6                                          | 0.9                                     | 1.0                                    |
| <i>RAD16</i>                               | 0.8                                     | 1.2                                     | 1                                            | 0.9                                     | 0.7                                    |
