# Supplementary material
Source: PubMed Central journal article supplement (PMC122405)
Supplement: pnas_99_5_2666__6.pdf [file pnas_99_5_2666__6.pdf]

Supporting information for Dasgupta *et al.* (2002) *Proc. Natl. Acad. Sci. USA* **99** (5), 2666–2671. (10.1073/pnas.052397899)

**Table 2. BNA1 does not regulate MOT1-controlled genes**

| <b>Gene name</b> | <b>Ratio of<br/><i>mot1-14</i> to<br/><i>MOT1+</i></b> | <b>Ratio of <i>bnal</i><br/><i>delta</i> to <i>BNA1+</i></b> |
|------------------|--------------------------------------------------------|--------------------------------------------------------------|
| <i>GND2</i>      | 3.6                                                    | 0.84                                                         |
| <i>HSP26</i>     | 7.6                                                    | 0.60                                                         |
| <i>YHR087W</i>   | 1.9                                                    | 0.92                                                         |
| <i>SGAI</i>      | 3.0                                                    | 0.90                                                         |
| <i>BNA1</i>      | 0.76                                                   | 0.25                                                         |
